# Supplementary material for: Surfactant-free microemulsions of 1-butyl-3-methylimidazolium hexafluorophosphate, propylamine nitrate, and water
Source: Royal Society of Chemistry journal article supplement (doi:10.1039/c7sm00155j), 2017-01-01
Supplement: c7sm00155j1.pdf [file c7sm00155j1.pdf]

## Electronic Supplementary Information (ESI)

### Surfactant-free microemulsions of 1-butyl-3-methylimidazolium hexafluorophosphate, propylamine nitrate, and water

Jie Xu,<sup>a</sup> Huanhuan Deng,<sup>a</sup> Yunlei Fu,<sup>a</sup> Yuquan Chen,<sup>a</sup> Jing Zhang,<sup>a</sup> Wanguo Hou <sup>\* b</sup>

<sup>a</sup> State Key Laboratory Base of Eco-chemical Engineering, Qingdao University of Science and Technology, Qingdao 266042, P.R. China;

<sup>b</sup> Key Laboratory of Colloid and Interface Chemistry (Ministry of Education), Shandong University, Jinan 250100, P.R. China

#### S1. Synthesis of Propylamine Nitrate (PAN)

*n*-Propylamine (AR, purity  $\geq 99.0\%$ ) and nitric acid (AR, 65–63% in water) used were purchased from Tianjin Chemical Reagents Co., China. PAN was prepared in our laboratory through base-acid reaction between *n*-propylamine and nitric acid, as shown in Scheme S1. Nitric acid that was prediluted to 20–25% in water was dropwise added to the equimolar quantity of *n*-propylamine at  $\sim 4$  °C under magnetic stirring. The mixture was kept magnetic stirring at  $\sim 4$  °C for 1 h to achieve complete reaction. Water in the crude product was removed using a rotary evaporator, and the resultant product was then dried under vacuum at 65 °C until constant weight.

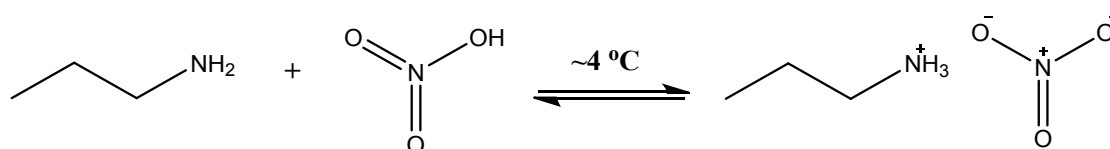

Scheme S1 Synthesis of propylamine nitrate (PAN).

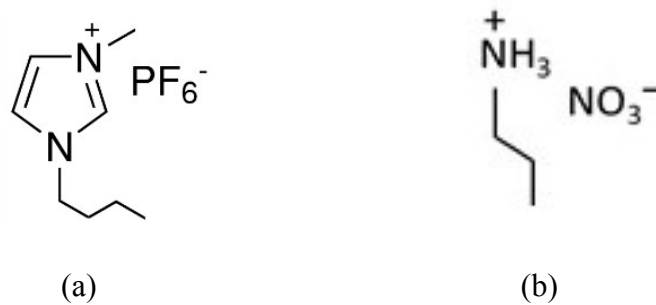

**Fig. S1** Molecular structures of (a) bmimPF<sub>6</sub> and (b) PAN.

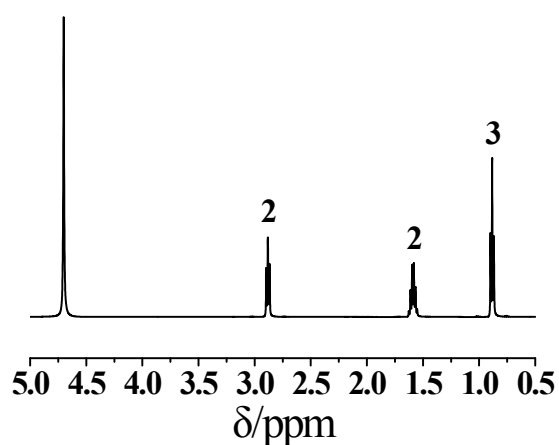

**Fig. S2** <sup>1</sup>H NMR spectrum of PAN sample in D<sub>2</sub>O.

$\delta$  0.884 (3H, *t*, -CH<sub>3</sub>), 1.588 (2H, *m*, -CH<sub>2</sub>CH<sub>3</sub>), and 2.882 (2H, *t*, -CH<sub>2</sub>NH<sup>3+</sup>).

The H in -NH<sup>3+</sup> can exchange with D in D<sub>2</sub>O, so the peak of -NH<sup>3+</sup> is covered up by the characteristic peak of the solvent at 4.7 ppm. No miscellaneous peaks are observed, indicating the so-obtained PAN sample has a high purity.

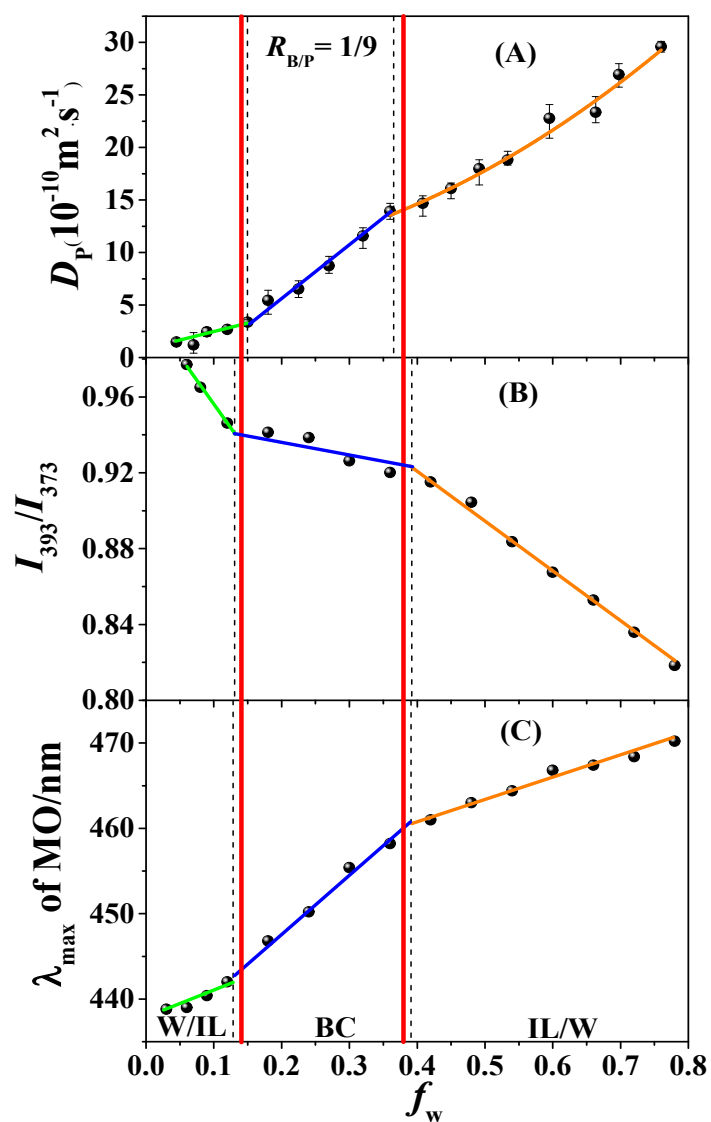

**Fig. S3** (A) Diffusion coefficient ( $D_p$ ) of  $\text{K}_3\text{Fe}(\text{CN})_6$ , (B) intensity ratio ( $I_{393}/I_{373}$ ) of pyrene, and (C)  $\lambda_{\text{max}}$  of MO in microemulsions at  $R_{B/P} = 1/9$  as a function of  $f_w$ . Concentrations of  $\text{K}_3\text{Fe}(\text{CN})_6$ , pyrene, and MO were  $0.65 \text{ g}\cdot\text{L}^{-1}$ ,  $4.95 \times 10^{-5} \text{ mol}\cdot\text{L}^{-1}$ , and  $0.005 \text{ g}\cdot\text{L}^{-1}$ , respectively.

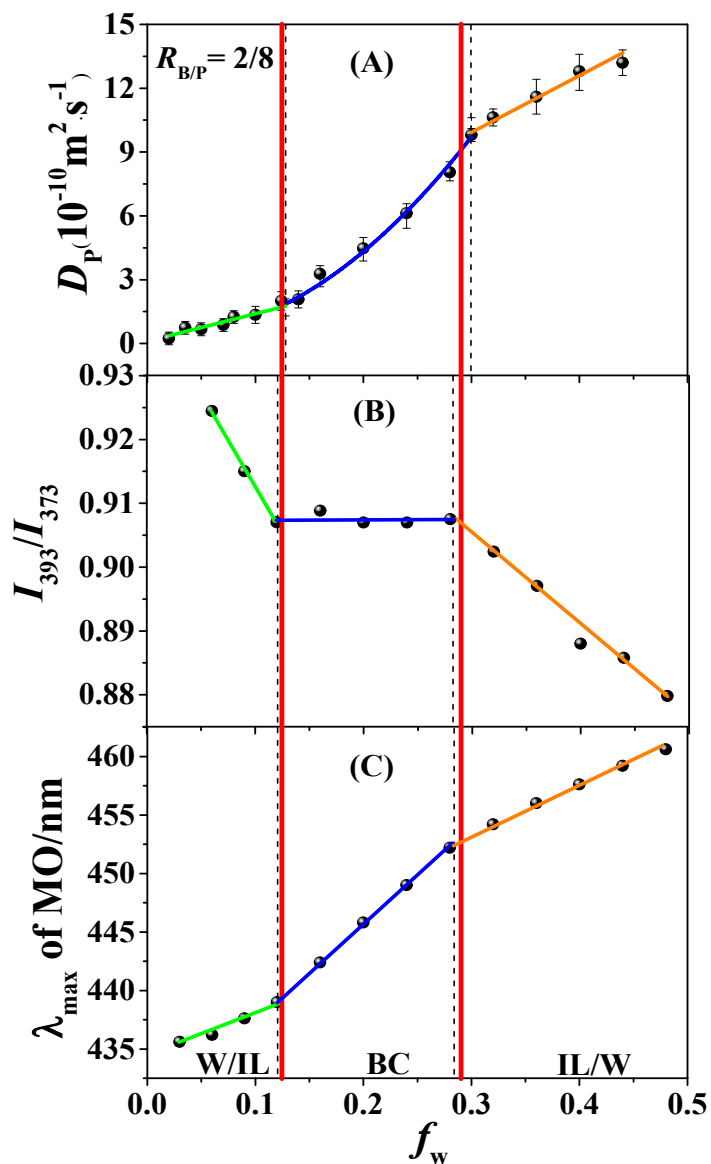

**Fig. S4** (A) Diffusion coefficient ( $D_p$ ) of  $\text{K}_3\text{Fe}(\text{CN})_6$ , (B) intensity ratio ( $I_{393}/I_{373}$ ) of pyrene, and (C)  $\lambda_{\text{max}}$  of MO in microemulsions at  $R_{B/P} = 2/8$  as a function of  $f_w$ . Concentrations of  $\text{K}_3\text{Fe}(\text{CN})_6$ , pyrene, and MO were  $0.65 \text{ g}\cdot\text{L}^{-1}$ ,  $4.95 \times 10^{-5} \text{ mol}\cdot\text{L}^{-1}$ , and  $0.005 \text{ g}\cdot\text{L}^{-1}$ , respectively.

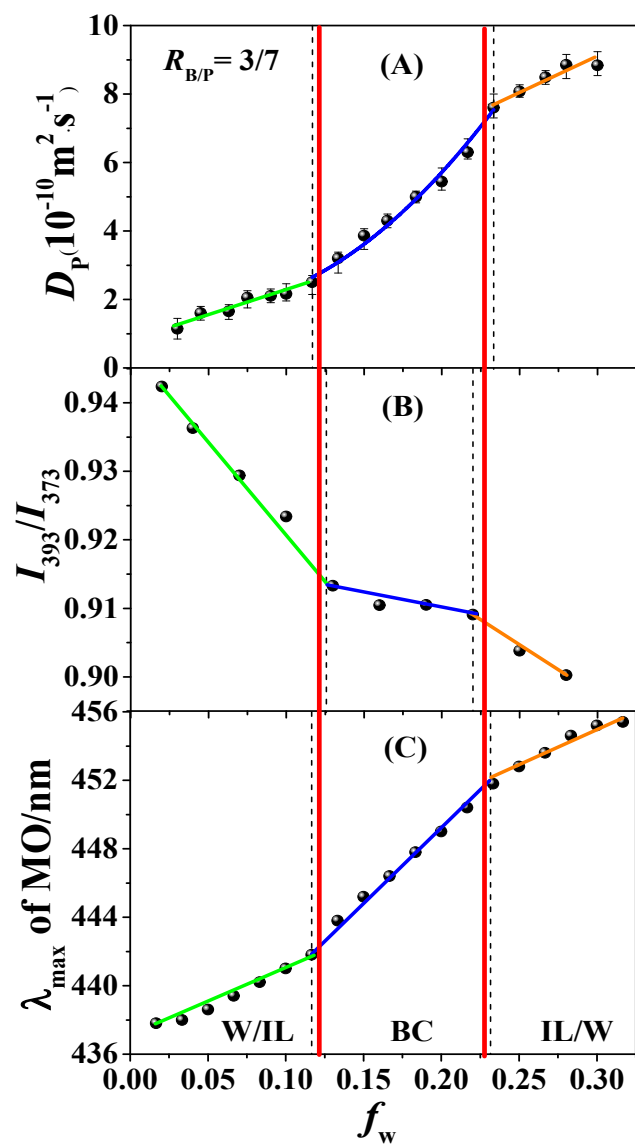

**Fig. S5** (A) Diffusion coefficient ( $D_p$ ) of  $K_3Fe(CN)_6$ , (B) intensity ratio ( $I_{393}/I_{373}$ ) of pyrene, and (C)  $\lambda_{max}$  of MO in microemulsions at  $R_{B/P} = 3/7$  as a function of  $f_w$ . Concentrations of  $K_3Fe(CN)_6$ , pyrene, and MO were  $0.65 g \cdot L^{-1}$ ,  $4.95 \times 10^{-5} mol \cdot L^{-1}$ , and  $0.005 g \cdot L^{-1}$ , respectively.

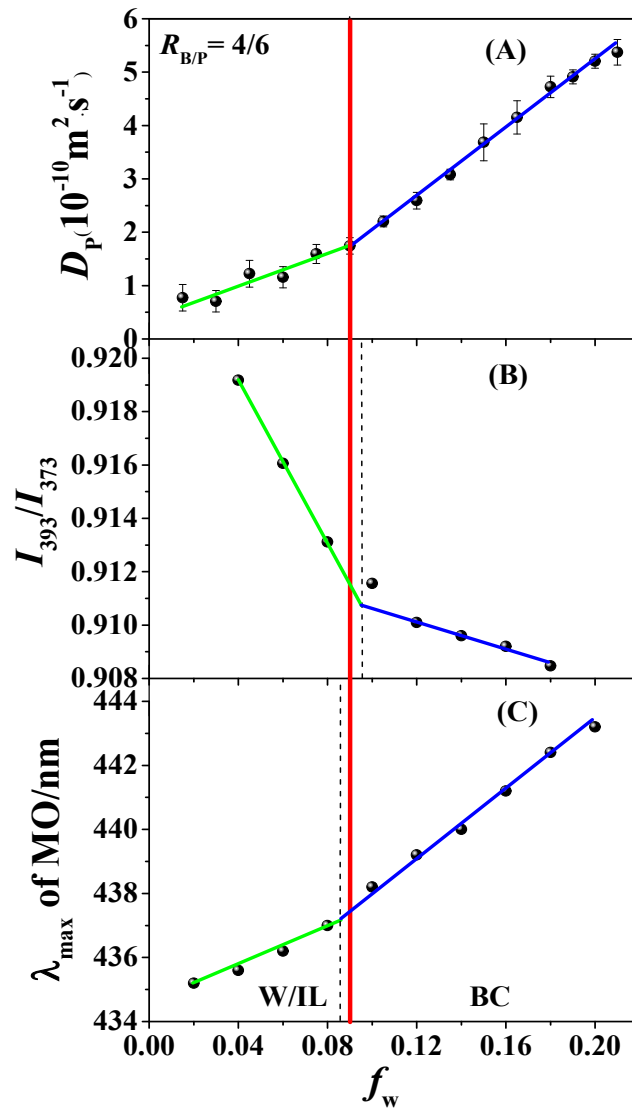

**Fig. S6** (A) Diffusion coefficient ( $D_p$ ) of  $K_3Fe(CN)_6$ , (B) intensity ratio ( $I_{393}/I_{373}$ ) of pyrene, and (C)  $\lambda_{max}$  of MO in microemulsions at  $R_{B/P} = 4/6$  as a function of  $f_w$ . Concentrations of  $K_3Fe(CN)_6$ , pyrene, and MO were  $0.65 \text{ g}\cdot\text{L}^{-1}$ ,  $4.95 \times 10^{-5} \text{ mol}\cdot\text{L}^{-1}$ , and  $0.005 \text{ g}\cdot\text{L}^{-1}$ , respectively.

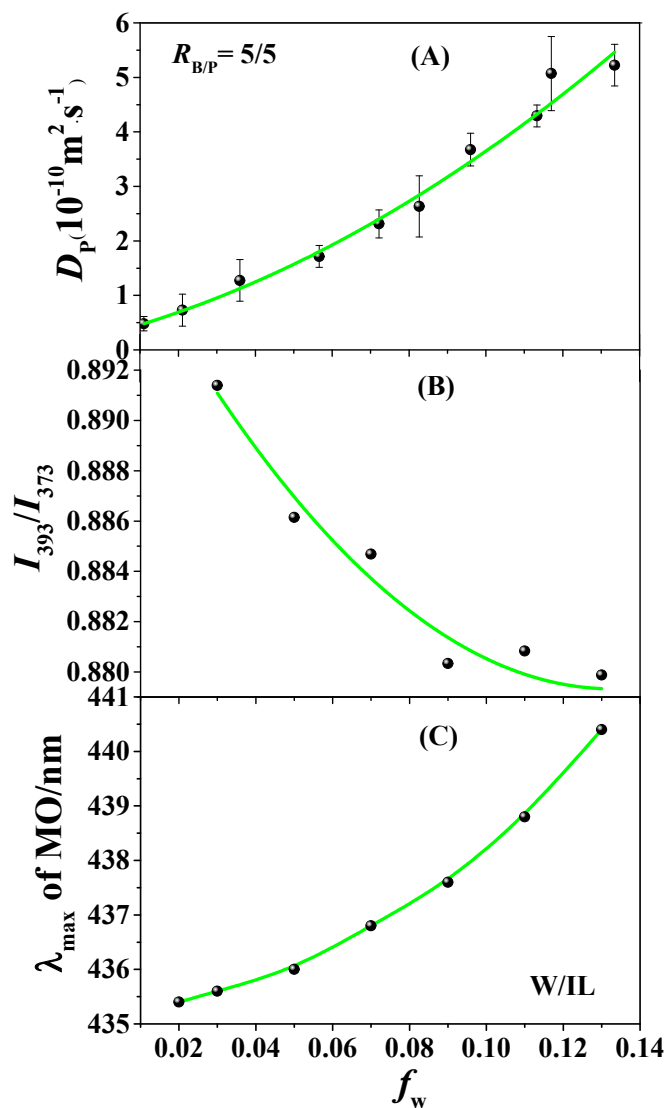

**Fig. S7** (A) Diffusion coefficient ( $D_p$ ) of  $K_3Fe(CN)_6$ , (B) intensity ratio ( $I_{393}/I_{373}$ ) of pyrene, and (C)  $\lambda_{max}$  of MO in microemulsions at  $R_{B/P} = 5/5$  as a function of  $f_w$ . Concentrations of  $K_3Fe(CN)_6$ , pyrene, and MO were  $0.65 \text{ g}\cdot\text{L}^{-1}$ ,  $4.95 \times 10^{-5} \text{ mol}\cdot\text{L}^{-1}$ , and  $0.005 \text{ g}\cdot\text{L}^{-1}$ , respectively.

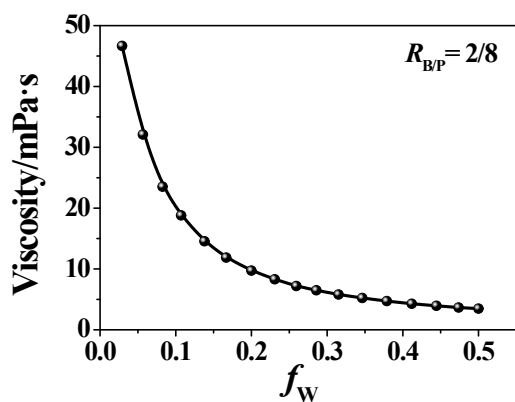

**Fig. S8** Viscosity of  $\text{bmimPF}_6/\text{PAN}/\text{water}$  ternary system with  $R_{B/P} = 2/8$  as a function of  $f_w$ .

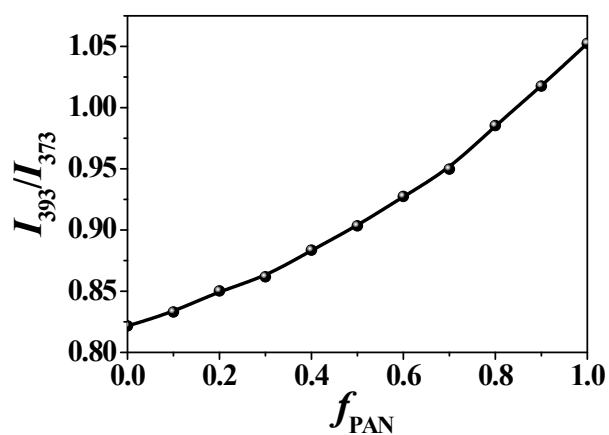

**Fig. S9** Intensity ratio  $I_{393}/I_{373}$  of pyrene as a function of PAN volume fraction ( $f_{\text{PAN}}$ ) in  $\text{pyrene}/\text{bmimPF}_6/\text{PAN}$  binary solution. The pyrene concentration is  $4.95 \times 10^{-5} \text{ mol} \cdot \text{L}^{-1}$ .



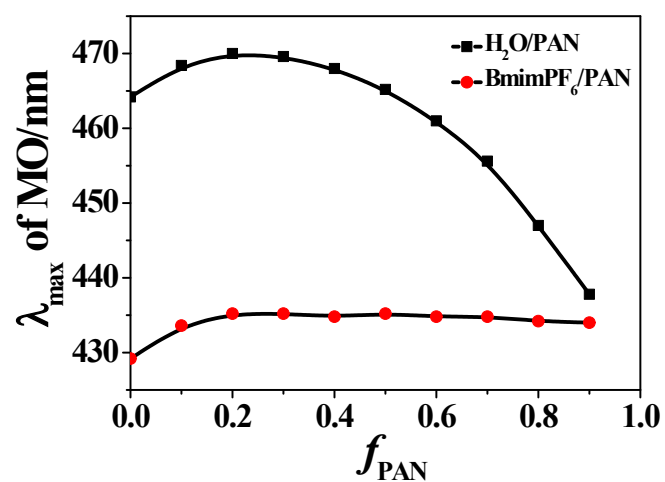

**Fig. S10** MO  $\lambda_{\text{max}}$  as a function of  $f_{\text{PAN}}$  in bmimPF<sub>6</sub>/PAN and water/PAN mixture solutions. The MO concentration is 0.005 g·L<sup>-1</sup>.

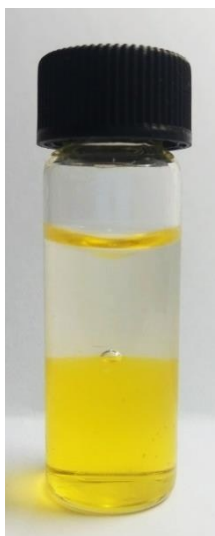

**Fig. S11** Photograph of bmimPF<sub>6</sub>-water two-phase system containing MO. Bright orange of bmimPF<sub>6</sub> phase (low phase) indicates that MO preferentially dissolves in bmimPF<sub>6</sub> phase.

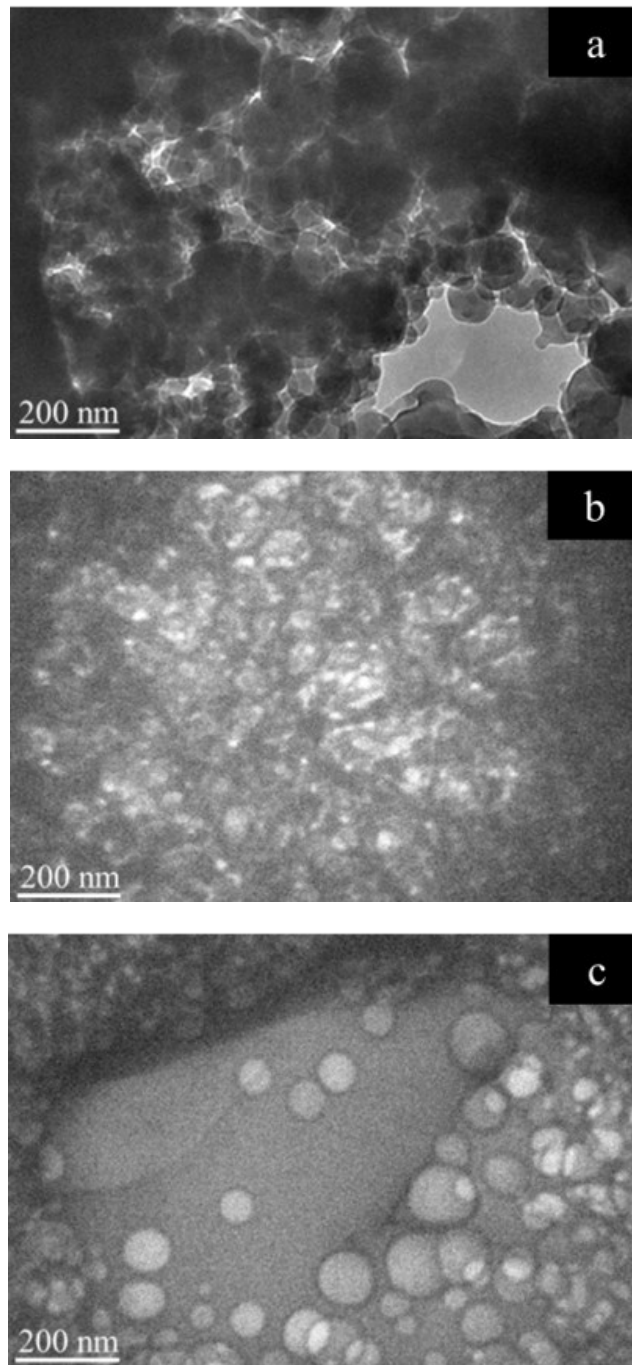

**Fig. S12** Cryo-TEM images of samples with  $R_{B/P/W}$  of (a) 0.286/0.667/0.047 in W/IL subregion, (b) 0.164/0.656/0.180 in BC subregion, and (c) 0.056/0.500/0.444 in IL/W subregion.

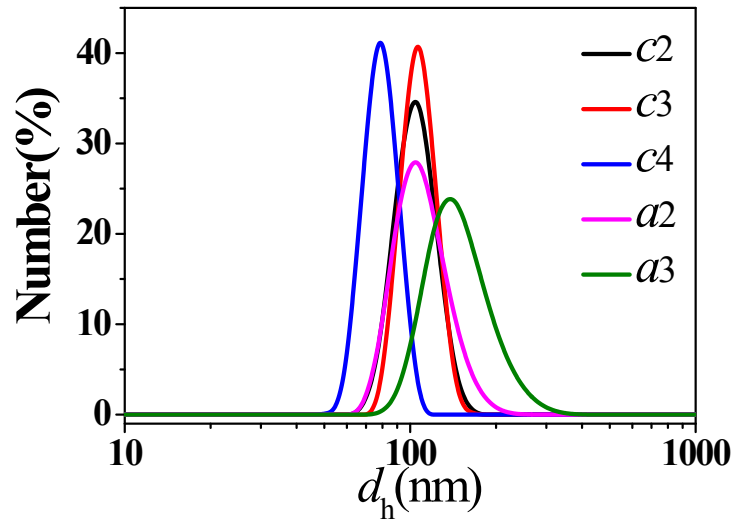

**Fig. S13** Size distributions of dispersed droplets for the samples  $a_2$ ,  $a_3$ ,  $c_2$ ,  $c_3$ , and  $c_4$  as marked in Fig. 1.
